# Supplementary material
Source: publisher site journal article supplement (https://www.dovepress.com/article/281920)
Supplement: Supplementary file 1 [file get_supplementary_file.php]

**
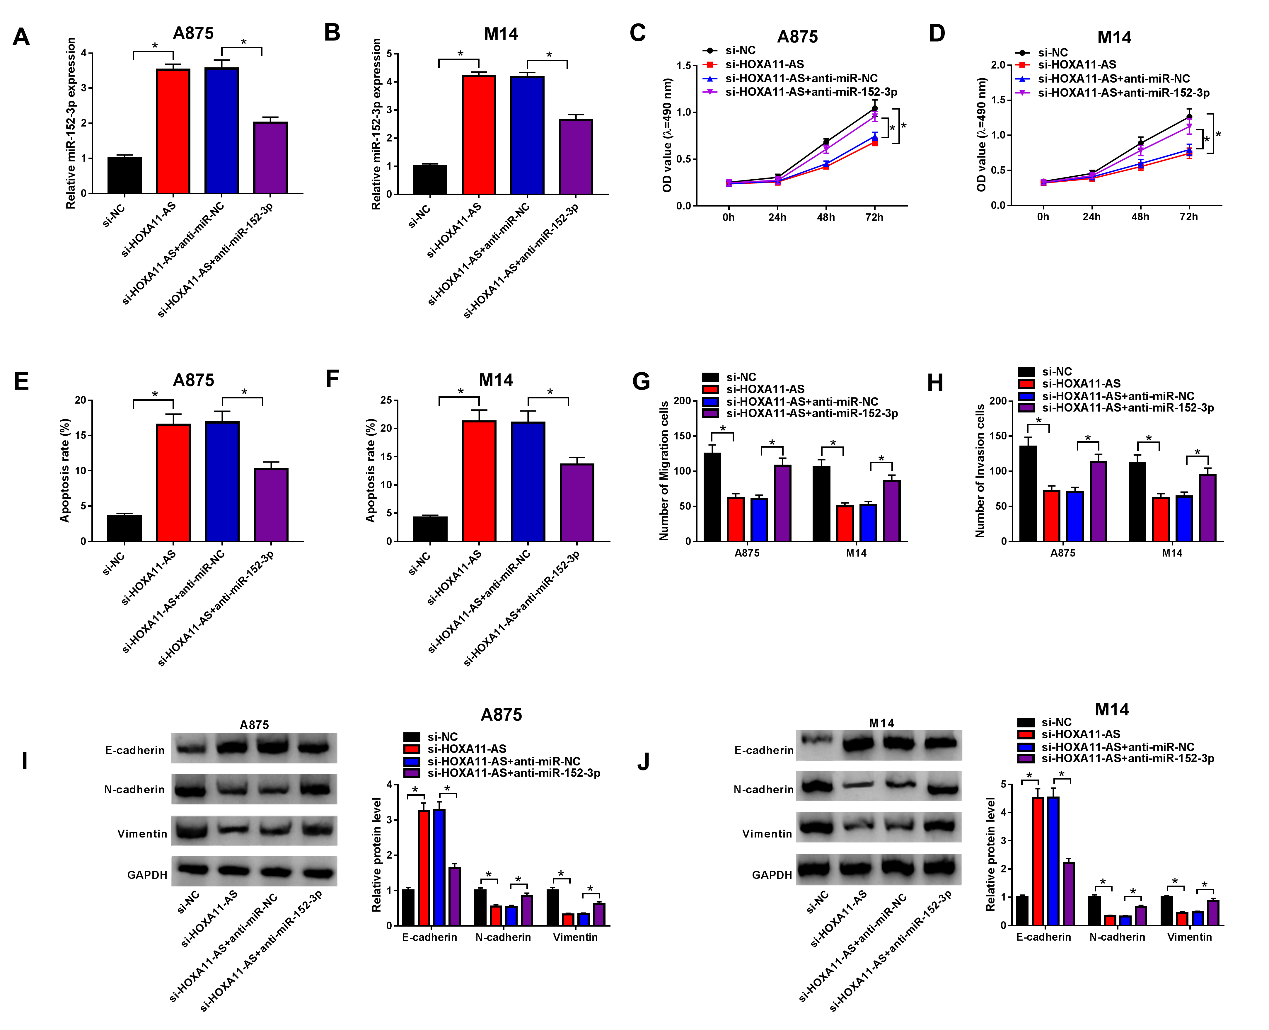
**

**Supplemental figure 1. The inhibitory effect of HOXA11-AS knockdown on the progression of melanoma was achieved by the up-regulation of miR-152-3p.** Transfection of si-NC, si-HOXA11-AS, si-HOXA11-AS+anti-miR-NC or si-HOXA11-AS+anti-miR-152-3p was administrated in A875 and M14 cells. (A and B) The detection of miR-152-3p was executed using qRT-PCR. (C-F) MTT and flow cytometry were used for the respective analysis of cell proliferation (C and D) and apoptosis (E and F). (G-J) Cell metastasis (G and H) and EMT process (I and J) were severally assayed via transwell migration/invasion assay and the levels of EMT-related proteins by western blot. **P*< 0.05.
